RETRACTION

## Retraction: Robust policy evaluation from large-scale observational studies

The *PLOS One* Editors

After publication of this article [1], the corresponding author notified *PLOS One* of an error in the p-value calculation caused by a coding error, affecting Fig 4 and related text in the Experiment and result subsection of [1].

Following input from a member of the Editorial Board, the *PLOS One* Editors concluded that the conclusion drawn from applying the mathematical model to the large-scale validation dataset, is incorrect. Specifically, after correcting the error, the revised analysis shows no causal relation between the Medicare Hospital Readmission Reduction Program (HRRP) and non-index readmissions. However, the evaluation of the model's scalability remains sound, and the study's methodological contribution is unaffected.

As the manuscript discusses the causal relationship extensively, and this forms a central aim of the study, the *PLOS One* Editors consider that a key conclusion is no longer upheld. To address this concern, the *PLOS One* Editors retract this article and have published an updated version of the article containing the corrected p-value calculation, an updated Fig 4, and revised conclusions [2].

All authors agreed with the retraction.

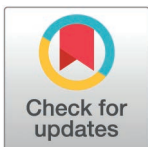

### References

1. Islam MS, Morshed MS, Young GJ, Noor-E-Alam M. RETRACTED: Robust policy evaluation from large-scale observational studies. *PLoS One*. 2019;14(10):e0223360. <https://doi.org/10.1371/journal.pone.0223360> PMID: [31603910](https://pubmed.ncbi.nlm.nih.gov/31603910/)
2. Islam MS, Morshed MS, Young GJ, Noor-E-Alam M. Robust policy evaluation from large-scale observational studies. *PLoS One*. 2019;14(10):e0223360. <https://doi.org/10.1371/journal.pone.0223360> PMID: [31603910](https://pubmed.ncbi.nlm.nih.gov/31603910/)

### OPEN ACCESS

**Citation:** The *PLOS One* Editors (2026) Retraction: Robust policy evaluation from large-scale observational studies. *PLoS One* 21(6): e0352001. <https://doi.org/10.1371/journal.pone.0352001>

**Published:** June 30, 2026

**Copyright:** © 2026 The *PLOS One* Editors. This is an open access article distributed under the terms of the [Creative Commons Attribution License](https://creativecommons.org/licenses/by/4.0/), which permits unrestricted use, distribution, and reproduction in any medium, provided the original author and source are credited.
